# Supplementary material for: Characterization of “Candidatus Ehrlichia Pampeana” in Haemaphysalis juxtakochi Ticks and Gray Brocket Deer (Mazama gouazoubira) from Uruguay
Source: MDPI journal article supplement (doi:10.3390/microorganisms9102165), 2021-10-17
Supplement: s1 [file s1]

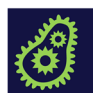

## Supplementary Materials

**Table S1.** Complete data of *Haemaphysalis juxtakochi* collected in vegetation for each site and detection of “*Candidatus* Ehrlichia pampeana”.

| Collection site          | Date          | Stage  | N° ticks | Pools | Positive pools |
|--------------------------|---------------|--------|----------|-------|----------------|
| Gruta de los Cuervos (T) | August 2016   | Female | 19       | 2     | 0              |
|                          |               | Male   | 28       | 3     | 0              |
|                          |               | Nymph  | 152      | 3     | 1              |
|                          |               | Larva  | 379      | -     | -              |
|                          | October 2016  | Female | 21       | 1     | 0              |
|                          |               | Male   | 23       | 1     | 1              |
|                          |               | Nymph  | 362      | 7     | 0              |
|                          |               | Larva  | 49       | -     | -              |
|                          | December 2016 | Female | 17       | 2     | 0              |
|                          |               | Male   | 16       | 2     | 0              |
|                          |               | Nymph  | 163      | 4     | 1              |
|                          |               | Larva  | 0        | -     | -              |
|                          | April 2017    | Female | 1        | 1     | 1              |
|                          |               | Male   | 2        | 1     | 0              |
|                          |               | Nymph  | 55       | 5     | 0              |
|                          |               | Larva  | 574      | -     | -              |
|                          | July 2017     | Female | 7        | 1     | 0              |
|                          |               | Male   | 8        | 1     | 0              |
|                          |               | Nymph  | 99       | 4     | 0              |
|                          |               | Larva  | 948      | -     | -              |
|                          | August 2017   | Female | 4        | 0     | 0              |
|                          |               | Male   | 9        | 0     | 0              |
|                          |               | Nymph  | 138      | 6     | 0              |
|                          |               | Larva  | 457      | -     | -              |
| Subtotal                 |               |        | 3531     | 44    | 4              |
| Amarillo (Ri)            | October 2016  | Female | 0        | 0     | 0              |
|                          |               | Male   | 0        | 0     | 0              |
|                          |               | Nymph  | 11       | 1     | 0              |
|                          |               | Larva  | 0        | -     | -              |
|                          | June 2017     | Female | 0        | 0     | 0              |
|                          |               | Male   | 0        | 0     | 0              |
|                          |               | Nymph  | 1        | 1     | 0              |
|                          |               | Larva  | 2        | -     | -              |
| Subtotal                 |               |        | 14       | 2     | 0              |
| Lunarejo (Ri)            | October 2016  | Female | 3        | 1     | 0              |
|                          |               | Male   | 4        | 1     | 0              |
|                          |               | Nymph  | 122      | 4     | 0              |
|                          |               | Larva  | 70       | -     | -              |
|                          | December 2016 | Female | 4        | 1     | 0              |
|                          |               | Male   | 5        | 1     | 0              |
|                          |               | Nymph  | 110      | 3     | 1              |
|                          |               | Larva  | 0        | -     | -              |
|                          | April 2017    | Female | 0        | 0     | 0              |
|                          |               | Male   | 1        | 1     | 0              |
|                          |               | Nymph  | 27       | 3     | 0              |

|                           |               |        |      |     |    |
|---------------------------|---------------|--------|------|-----|----|
|                           |               | Larva  | 319  | -   | -  |
|                           | July 2017     | Female | 3    | 1   | 0  |
|                           |               | Male   | 5    | 1   | 0  |
|                           |               | Nymph  | 142  | 5   | 0  |
|                           |               | Larva  | 541  | -   | -  |
| Subtotal                  |               |        | 1356 | 22  | 1  |
| Reserva Natural Salus (L) | May 2016      | Female | 0    | 0   | 0  |
|                           |               | Male   | 0    | 0   | 0  |
|                           |               | Nymph  | 29   | 2   | 0  |
|                           |               | Larva  | 71   | -   | -  |
|                           | December 2016 | Female | 2    | 1   | 0  |
|                           |               | Male   | 4    | 1   | 0  |
|                           |               | Nymph  | 46   | 3   | 0  |
|                           |               | Larva  | 1    | -   | -  |
|                           | July 2017     | Female | 1    | 1   | 0  |
|                           |               | Male   | 0    | 0   | 0  |
|                           |               | Nymph  | 49   | 2   | 0  |
|                           |               | Larva  | 410  | -   | -  |
|                           | Subtotal      |        |      | 613 | 10 |
| Laguna Negra (Ro)         | March 2014    | Female | 0    | 0   | 0  |
|                           |               | Male   | 0    | 0   | 0  |
|                           |               | Nymph  | 9    | 1   | 0  |
|                           |               | Larva  | 35   | -   | -  |
|                           | May 2014      | Female | 1    | 1   | 0  |
|                           |               | Male   | 0    | 0   | 0  |
|                           |               | Nymph  | 8    | 1   | 0  |
|                           |               | Larva  | 26   | -   | -  |
|                           | August 2014   | Female | 0    | 0   | 0  |
|                           |               | Male   | 2    | 1   | 0  |
|                           |               | Nymph  | 70   | 7   | 0  |
|                           |               | Larva  | 10   | -   | -  |
|                           | November 2014 | Female | 6    | 1   | 0  |
|                           |               | Male   | 0    | 0   | 0  |
|                           |               | Nymph  | 88   | 9   | 1  |
|                           |               | Larva  | 3    | -   | -  |
| Subtotal                  |               |        | 258  | 21  | 1  |
| Total                     |               |        | 5772 | 99  | 6  |

(T) Tacuarembó, (Ri) Rivera, (L) Lavalleja, (Ro) Rocha.
